# Supplementary material
Source: PubMed Central journal article supplement (PMC527699)
Supplement: bmj_329_7475_1163__1.pdf [file bmj_329_7475_1163__1.pdf]

[Posted as supplied by author]

**A box of the five components of the DOTS strategy**

**The five components of the DOTS strategy**

1. Sustained political commitment
2. Access to quality-assured sputum microscopy
3. Standardized short-course chemotherapy for all cases of TB under proper case management conditions, including direct observation of treatment
4. Uninterrupted supply of quality-assured drugs
5. Recording and reporting system enabling outcome assessment of all patients and assessment of overall programme performance
