# Supplementary material
Source: PubMed Central journal article supplement (PMC527699)
Supplement: bmj_329_7475_1163__2.pdf [file bmj_329_7475_1163__2.pdf]

## Patient master record card for antiretroviral therapy

**Figure 2: PATIENT MASTER RECORD CARD FOR ARV:** Unique ARV Number \_\_\_\_\_ Year \_\_\_\_\_

Name \_\_\_\_\_ Age \_\_\_\_\_ Sex \_\_\_\_\_ Initial Wt (Kg) \_\_\_\_\_ Transfer-In (Y/N) \_\_\_\_\_

Address (physical / PO Box) \_\_\_\_\_

Name of identifiable guardian \_\_\_\_\_ Date and place of positive HIV test \_\_\_\_\_

Date of starting 1<sup>st</sup> line ARV regimen (specify d4t/3TC/NVP formulation) \_\_\_\_\_ Reason for ARV: \_\_\_\_\_

Date of starting alternative 1<sup>st</sup> line ARV regimen (specify) \_\_\_\_\_ Date of starting 2<sup>nd</sup> line ARV regimen (specify) \_\_\_\_\_

| Year | Month | Date | Wt Kg | Outcome status |   |    |      |    | Of those alive |     |        | Ambulatory |     | Work/school |    | Side effects |   | No. Pills in Bottle | ARV Given |   | ARV not given |  |
|------|-------|------|-------|----------------|---|----|------|----|----------------|-----|--------|------------|-----|-------------|----|--------------|---|---------------------|-----------|---|---------------|--|
|      |       |      |       | A              | D | DF | Stop | TO | Start          | Sbs | Switch | Amb        | Bed | Yes         | No | Y            | N |                     | P         | G |               |  |
|      | Jan   |      |       |                |   |    |      |    |                |     |        |            |     |             |    |              |   |                     |           |   |               |  |
|      | Feb   |      |       |                |   |    |      |    |                |     |        |            |     |             |    |              |   |                     |           |   |               |  |
|      | Mar   |      |       |                |   |    |      |    |                |     |        |            |     |             |    |              |   |                     |           |   |               |  |
|      | Apr   |      |       |                |   |    |      |    |                |     |        |            |     |             |    |              |   |                     |           |   |               |  |
|      | May   |      |       |                |   |    |      |    |                |     |        |            |     |             |    |              |   |                     |           |   |               |  |
|      | Jun   |      |       |                |   |    |      |    |                |     |        |            |     |             |    |              |   |                     |           |   |               |  |
|      | Jul   |      |       |                |   |    |      |    |                |     |        |            |     |             |    |              |   |                     |           |   |               |  |
|      | Aug   |      |       |                |   |    |      |    |                |     |        |            |     |             |    |              |   |                     |           |   |               |  |
|      | Sep   |      |       |                |   |    |      |    |                |     |        |            |     |             |    |              |   |                     |           |   |               |  |
|      | Oct   |      |       |                |   |    |      |    |                |     |        |            |     |             |    |              |   |                     |           |   |               |  |
|      | Nov   |      |       |                |   |    |      |    |                |     |        |            |     |             |    |              |   |                     |           |   |               |  |
|      | Dec   |      |       |                |   |    |      |    |                |     |        |            |     |             |    |              |   |                     |           |   |               |  |

**Specify reason for ARV therapy (Stage III, Stage IV, CD4 < 200, PTB, EPTB, Transfer-in)**

**Outcome status:** A =alive; D=dead; DF=defaulted and not seen for 3 months; Stop=stopped medication; TO=transferred out to another unit

**Of those alive:** Start=alive and on first line regimen; Sbs=alive and substituted to alternative first line regimen;

Switch=alive and switched to a second line regimen because of failure of first line regimen

**Ambulatory:** Amb=able to walk to/at treatment unit and walks at home unaided; Bed=most of time in bed at home

**Work/school:** Yes=engaged in previous work / employment or at school; No=not engaged in previous work /employment or not at school

**Side effects:** If Yes, specify – YES-PN= peripheral neuropathy; YES-HP=hepatitis; YES-SK=skin rash

**No.Pills in bottle:** if patient comes at 4 weeks count number of pills in bottle (8 pills or less = 95% adherent)

**ARV given / not given:** tick whether ARV therapy given in the appropriate column **P** = patient, **G** = Guardian; if no ARV, then indicate why
